# Supplementary material for: Novel approach to enhancing the anticancer efficacy of methyl jasmonate with PEG-incorporated cationic polymers
Source: Royal Society of Chemistry journal article supplement (doi:10.1039/d4ma00146j), 2024-01-01
Supplement: d4ma00146j1.pdf [file d4ma00146j1.pdf]

## Electronic Supplementary Information

### Novel Approach to Enhancing the Anticancer Efficacy of Methyl Jasmonate with PEG-incorporated Cationic Polymers

Nishant Kumar,<sup>a,b</sup> Pratibha Singh<sup>a,c</sup>, Dandan Zhao<sup>a</sup>, Robin Rajan<sup>\*a</sup>, and Kazuaki Matsumura<sup>\*a</sup>

<sup>a</sup> School of Materials Science, Japan Advanced Institute of Science and Technology, 1-1 Asahidai, Nomi, Ishikawa 923-1292, Japan. Email: robin@jaist.ac.jp, mkazuaki@jaist.ac.jp.

<sup>b</sup> Research Center for Macromolecules and Biomaterials, Data-driven Polymer Design Group, National Institute for Materials Science, Tsukuba, Japan

<sup>c</sup> Department of Chemistry, The University of Manchester, Manchester, UK

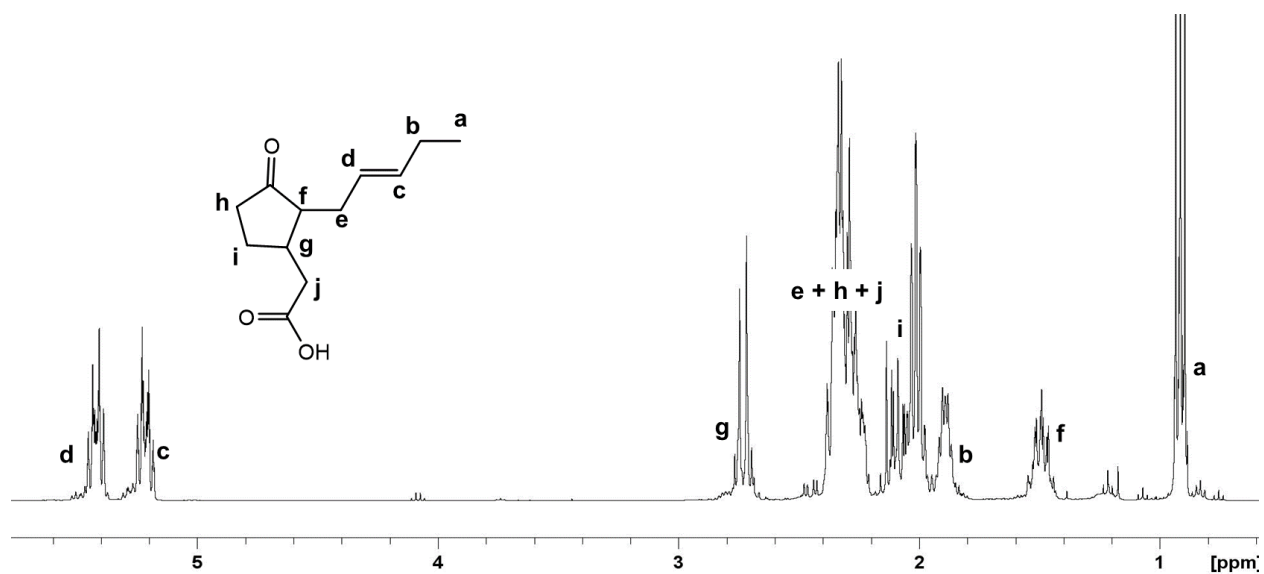

**Figure S1:** Confirmation of jasmonic acid (JA) formation using <sup>1</sup>H-NMR.

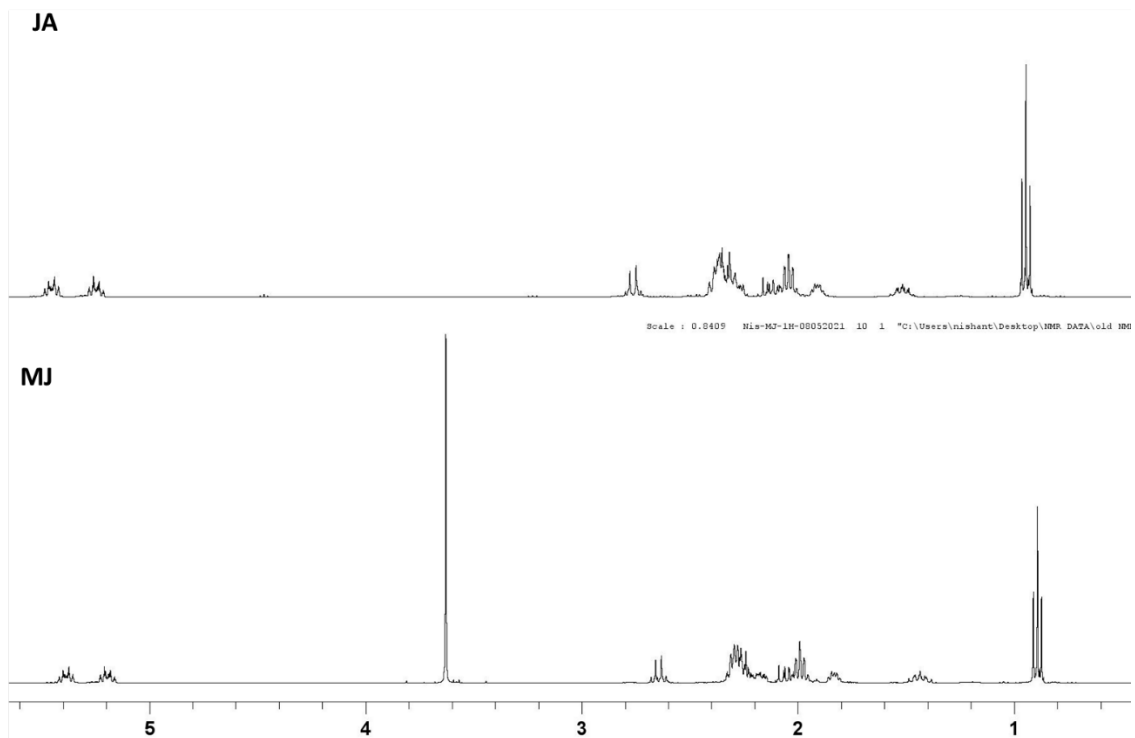

**Figure S2:** Comparison of the <sup>1</sup>H-NMR spectra of methyl jasmonate (MJ) and jasmonic acid (JA).

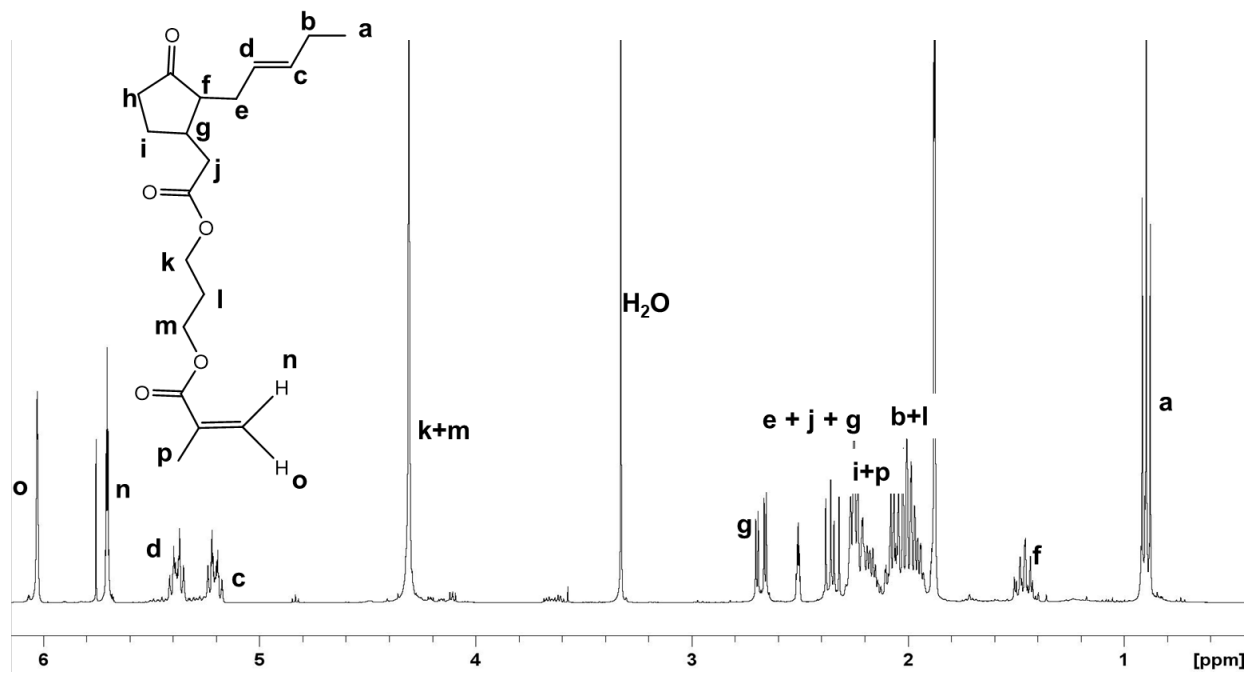

**Figure S3:** Confirmation of JA-HEMA monomer formation using <sup>1</sup>H-NMR.

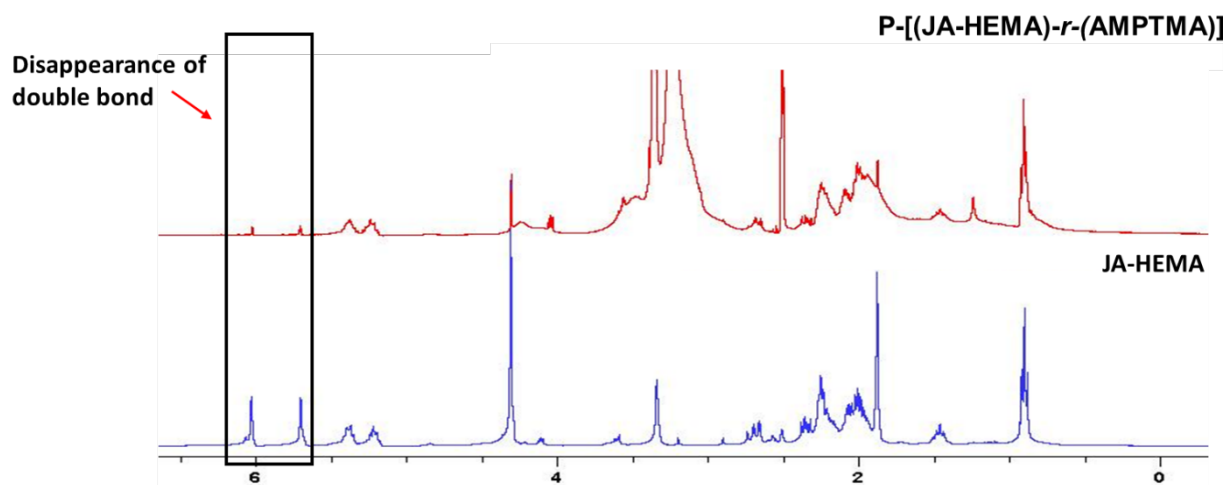

**Figure S4:** Comparison of the <sup>1</sup>H-NMR spectra of the JA-HEMA monomer and its copolymer P-[(JA-HEMA)-r-(AMPTMA)].

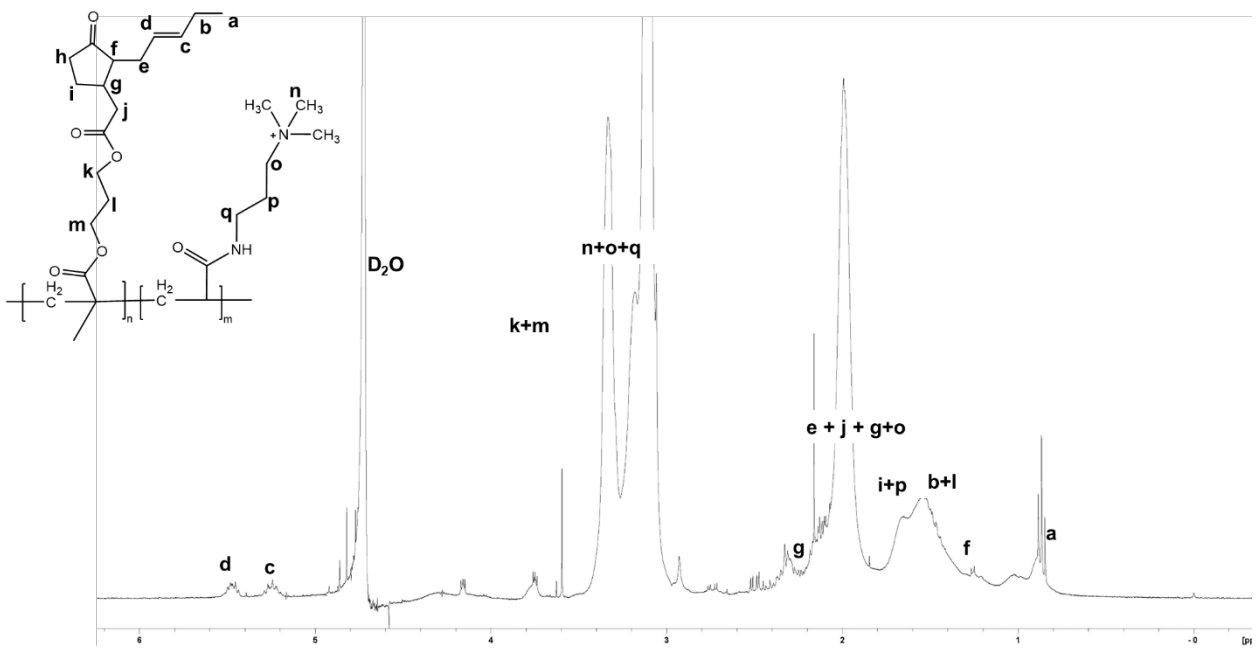

**Figure S5:** <sup>1</sup>H-NMR spectrum of the copolymer P-[(JA-HEMA)-r-(AMPTMA)].

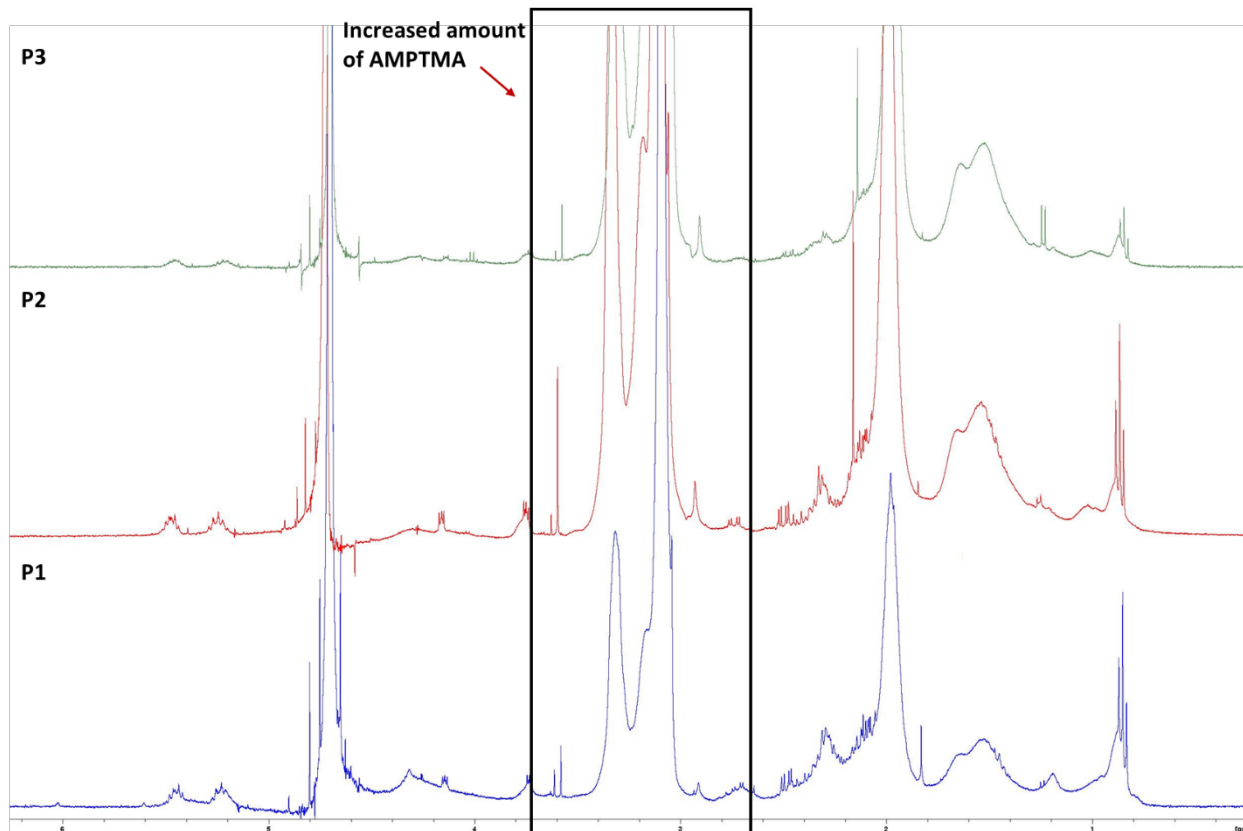

**Figure S6:** Comparison of copolymers formed from P-[(JA-HEMA)-r-(AMPTMA)].

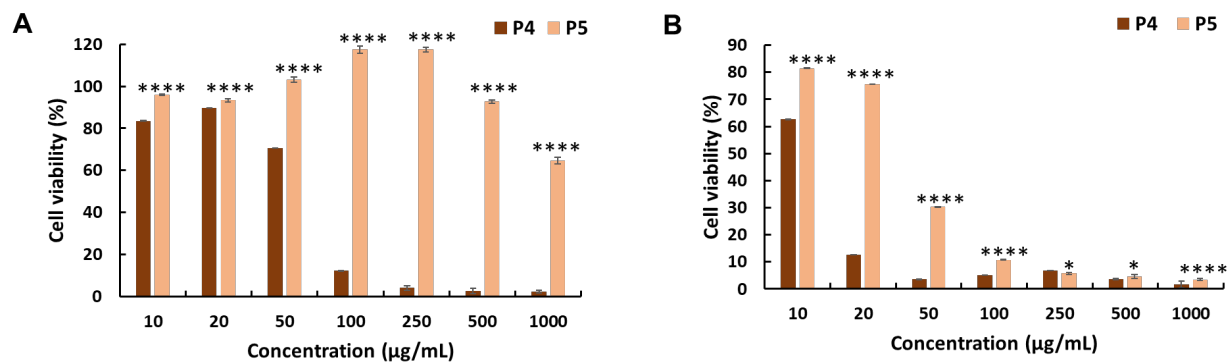

**Figure S7:** Cell viability of (A) HepG2 cancer cells and (B) normal human dermal fibroblasts after treatment with polymers synthesized from P4 and P5. Statistical analysis was performed using two-way ANOVA with Šidák's multiple comparison test ( $n = 4$ ),  $P < 0.05$ .

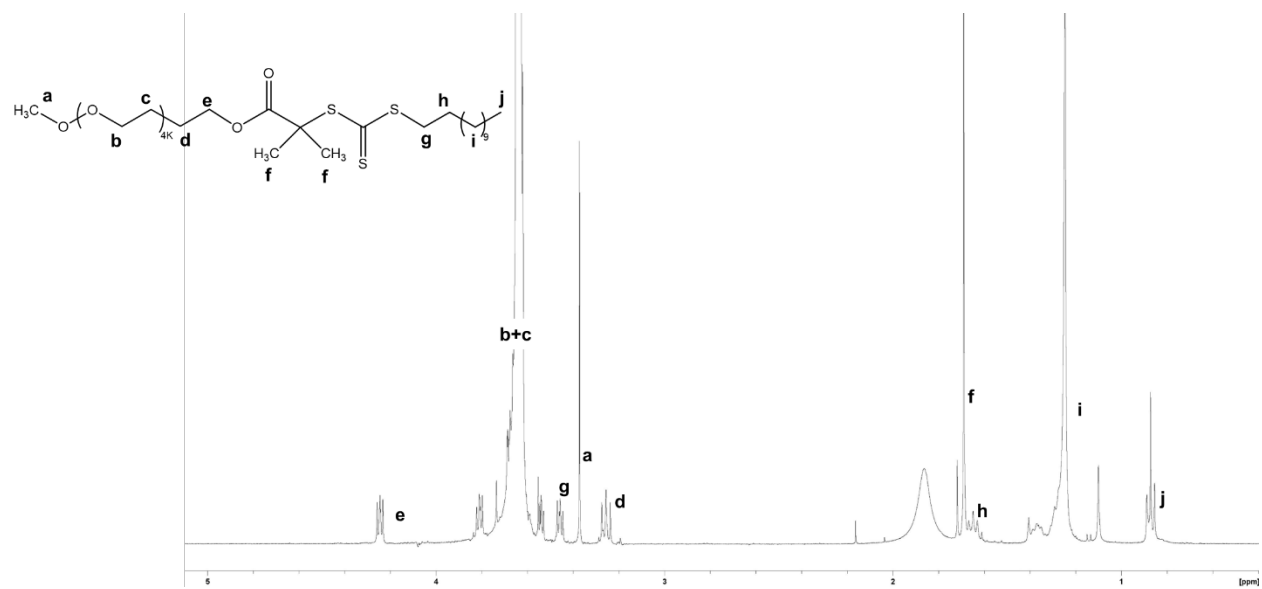

**Figure S8:**  $^1\text{H-NMR}$  spectrum of the macro-RAFT agent PEG-CTA.

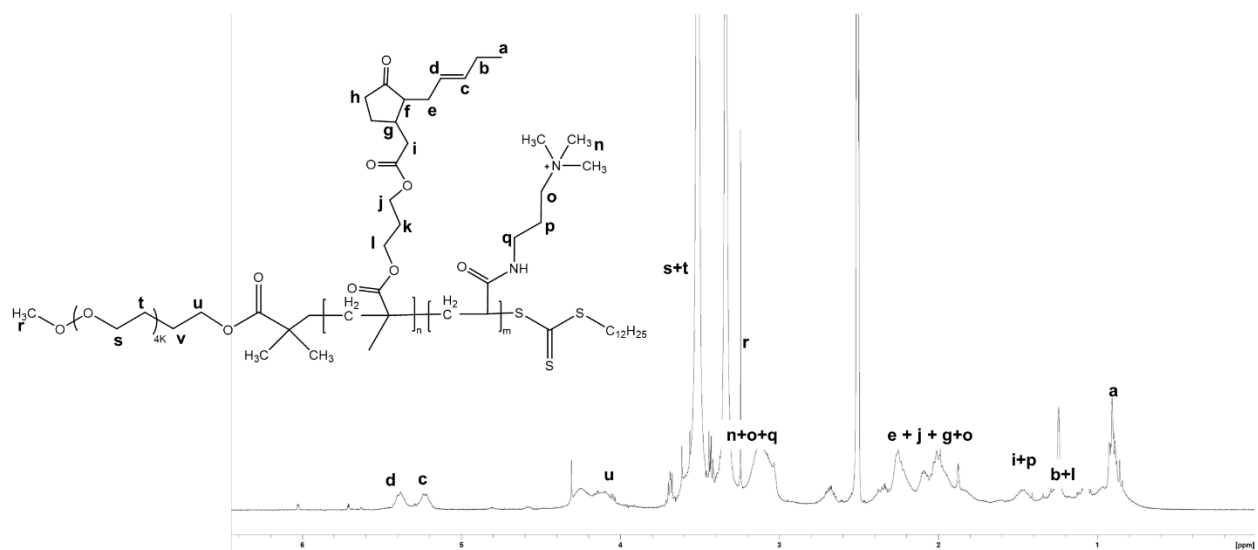

**Figure S9:**  $^1\text{H-NMR}$  spectrum of the PEG-based copolymers of JA-HEMA and AMPTMA.

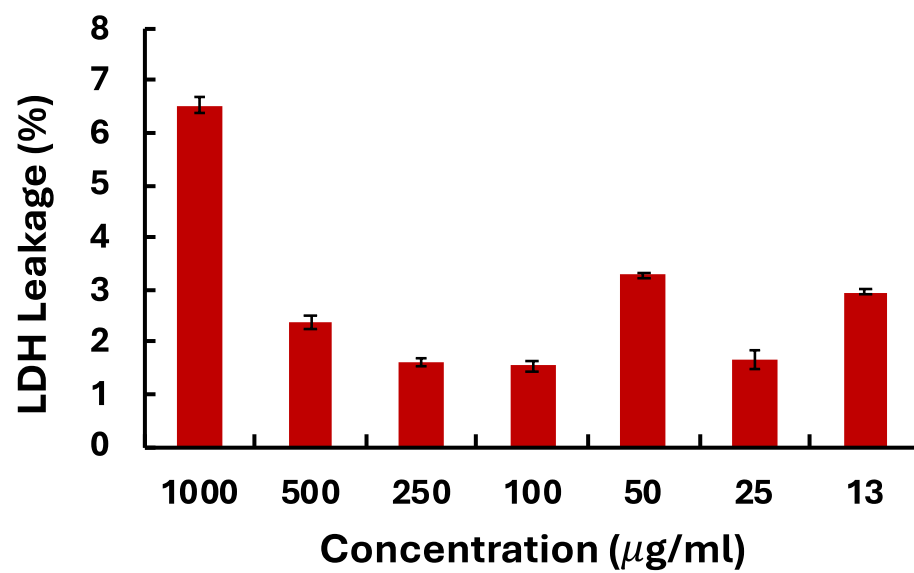

**Figure S10:** Lactate dehydrogenase leakage induced by polymer P8 in HepG2 cells.
